# Supplementary material for: Coupling piezoelectric and piezoresistive effects in flexible pressure sensors for human motion detection from zero to high frequency
Source: Royal Society of Chemistry journal article supplement (doi:10.1039/d1tc01894a), 2021-01-01
Supplement: d1tc01894a1.pdf [file d1tc01894a1.pdf]

*Supporting Information*

**Coupling piezoelectric and piezoresistive effects in flexible pressure sensors for human motion detection from zero to high frequency**

*Lijun Lu,<sup>a</sup> Ning Zhao,<sup>b,\*</sup> Jingquan Liu,<sup>a</sup> Bin Yang<sup>a,\*</sup>*

<sup>a</sup> National Key Laboratory of Science and Technology on Micro/Nano Fabrication; Department of Micro/Nano Electronics, Shanghai Jiao Tong University, Shanghai, 200240, China

<sup>b</sup> Department of orthodontics, Shanghai Ninth People's Hospital, Shanghai Jiao Tong University School of Medicine; College of Stomatology, Shanghai Jiao Tong University; National Center for Stomatology; National Clinical Research Center for Oral Diseases; Shanghai Key Laboratory of Stomatology

\*Corresponding author. E-mail: [binyang@sjtu.edu.cn](mailto:binyang@sjtu.edu.cn) (B. Yang)

E-mail: [zhaon1995@126.com](mailto:zhaon1995@126.com) (N. Zhao)

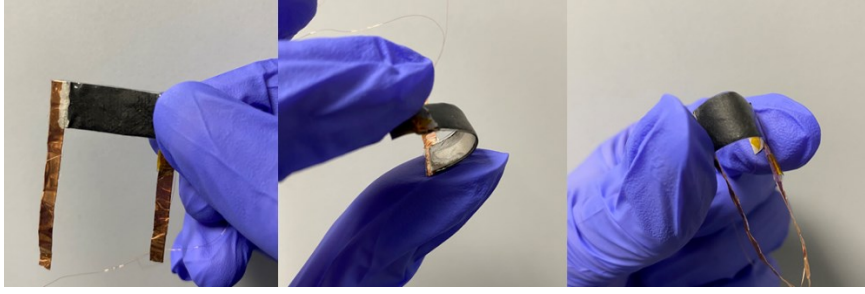

**Fig. S1.** Optical images of the flexible DMFS.

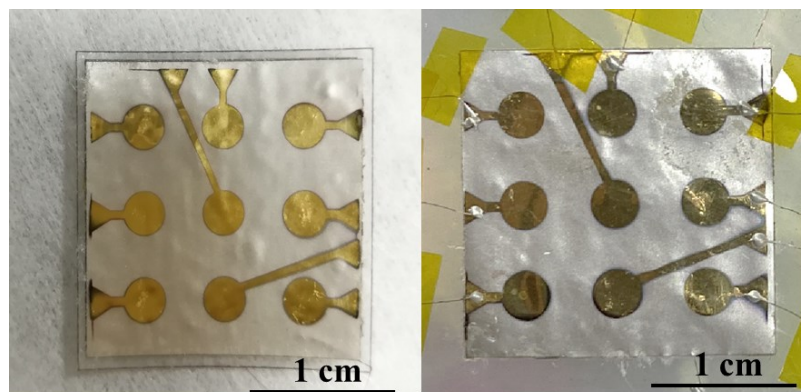

**Fig. S2.** The photo of DMFS array before and after leading wire.

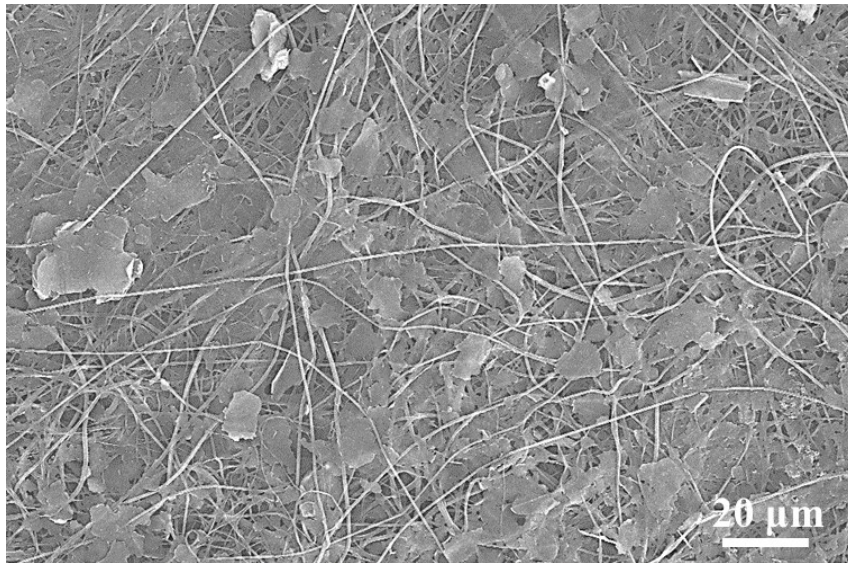

**Fig. S3.** SEM image of GS/PVDF at lower magnification.

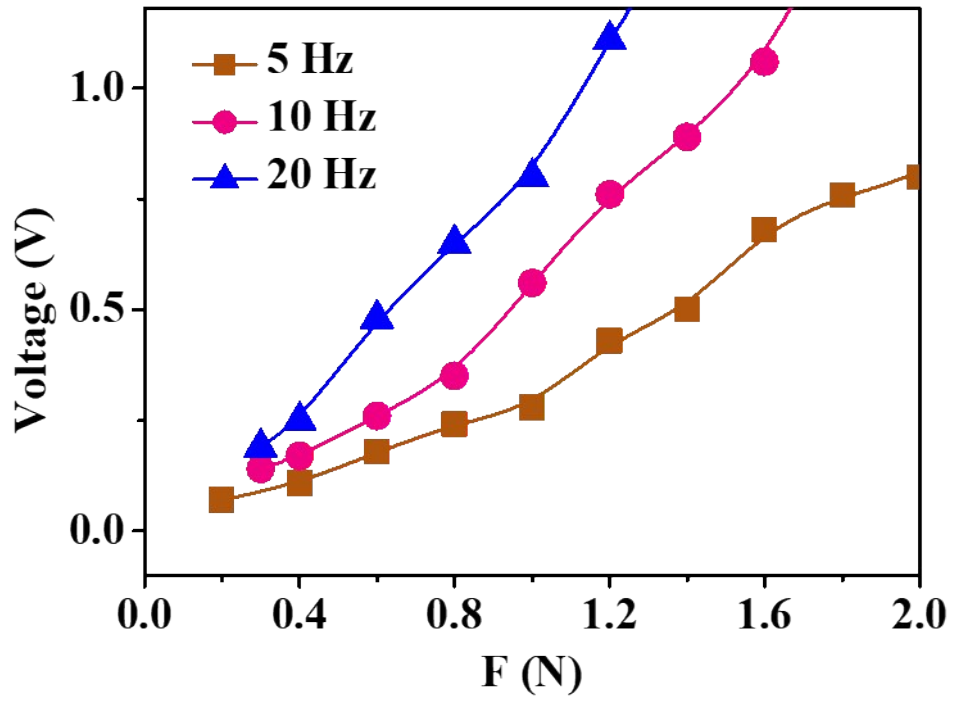

**Fig. S4.** The output peak voltage characteristics of DMFS at the applied frequency of 5, 10, and 20 Hz.

**Table S1.** Comparison of performance with recent piezoelectric and piezoresistive pressure sensor.

| <b>Mechanisms</b> | <b>Materials</b>        | <b>Response time (ms)</b> | <b>Recovery time (ms)</b> | <b>Sensitivity</b>       | <b>Ref.</b> |
|-------------------|-------------------------|---------------------------|---------------------------|--------------------------|-------------|
| Piezoelectric     | ZnO                     | 18.2                      | -                         | 28.7 mV/N                | [1]         |
| Piezoelectric     | PZT/PVDF                | 21                        | 30                        | 6.38 mV/N                | [2]         |
| Piezoelectric     | PVDF/ZnO                | 16                        | 16                        | 0.33 V/kPa               | [3]         |
| Piezoelectric     | PVDF                    | 30                        | 22                        | 60.82 mV/N               | [4]         |
| Piezoelectric     | PVDF                    | 55                        | 120                       | 0.008 V/kPa              | [5]         |
| Piezoelectric     | GaN/p-GaN               | 55                        | 55                        | 14.25 V/kPa              | [6]         |
| Piezoelectric     | PZT/PDMS                | -                         | -                         | 8.59 mV/kPa              | [7]         |
| Piezoelectric     | PZT                     | 60                        | -                         | 0.075 V/kPa              | [8]         |
| Piezoresistive    | Au/PDMS                 | 50                        | 50                        | 2.0 kPa <sup>-1</sup>    | [9]         |
| Piezoresistive    | PDMS/CNT                | 48                        | -                         | 0.34 kPa <sup>-1</sup>   | [10]        |
| Piezoresistive    | MXene/Aramid nanofibers | 320                       | 98                        | 128 kPa <sup>-1</sup>    | [11]        |
| Piezoresistive    | Graphene/paper          | 120                       | 60                        | 17.2 kPa <sup>-1</sup>   | [12]        |
| Piezoresistive    | rGO/PDMS                | 120                       | 80                        | 25.1 kPa <sup>-1</sup>   | [13]        |
| Piezoresistive    | MXene/PDMS              | 125                       | 104                       | 151.4 kPa <sup>-1</sup>  | [14]        |
| Piezoresistive    | rGO/PANI sponge         | 96                        | -                         | 0.152 kPa <sup>-1</sup>  | [15]        |
| Piezoresistive    | MXene-sponge            | 138                       | 127                       | 442 kPa <sup>-1</sup>    | [16]        |
| Piezoelectric     | PVDF                    | 25                        | 25                        | 830 mV/N                 | This        |
| Piezoresistive    | GS/PVDF                 | 70                        | 70                        | 0.0005 kPa <sup>-1</sup> | work        |

## References

1. S. Joshi, M. M. Nayak and K. Rajanna, *Small*, 2018, 14, 9.
2. G. Tian, W. L. Deng, Y. Y. Gao, D. Xiong, C. Yan, X. B. He, T. Yang, L. Jin, X. Chu, H. T. Zhang, W. Yan and W. Q. Yang, *Nano Energy*, 2019, 59, 574-581.

3. W. L. Deng, T. Yang, L. Jin, C. Yan, H. C. Huang, X. Chu, Z. X. Wang, D. Xiong, G. Tian, Y. Y. Gao, H. T. Zhang and W. Q. Yang, *Nano Energy*, 2019, 55, 516-525.
4. L. Lu, B. Yang, Y. Zhai and J. Liu, *Nano Energy*, 2020, 76, 104966.
5. C. R. Deng, W. Tang, L. Liu, B. D. Chen, M. C. Li and Z. L. Wang, *Adv. Funct. Mater.*, 2018, 28, 9.
6. G. Lin, Z. Fei and L. Chunfeng, *Applied Mechanics and Materials*, 2014, 530-531, 50-53.
7. X. J. Hou, S. N. Zhang, J. B. Yu, M. Cui, J. He, L. Li, X. D. Wang and X. J. Chou, *Energy Technol.*, 2020, 8, 11.
8. D. Y. Park, D. J. Joe, D. H. Kim, H. Park, J. H. Han, C. K. Jeong, H. Park, J. G. Park, B. Joung and K. J. Lee, *Adv. Mater.*, 2017, 29, 9.
9. H. Park, Y. R. Jeong, J. Yun, S. Y. Hong, S. Jin, S. J. Lee, G. Zi and J. S. Ha, *Acs Nano*, 2015, 9, 9974-9985.
10. C. Ma, D. Xu, Y. C. Huang, P. Q. Wang, J. Huang, J. Y. Zhou, W. F. Liu, S. T. Li, Y. Huang and X. F. Duan, *Acs Nano*, 2020, 14, 12866-12876.
11. L. Wang, M. Y. Zhang, B. Yang, J. J. Tan and X. Y. Ding, *Acs Nano*, 2020, 14, 10633-10647.
12. L. Q. Tao, K. N. Zhang, H. Tian, Y. Liu, D. Y. Wang, Y. Q. Chen, Y. Yang and T. L. Ren, *Acs Nano*, 2017, 11, 8790-8795.
13. Y. Pang, K. N. Zhang, Z. Yang, S. Jiang, Z. Y. Ju, Y. X. Li, X. F. Wang, D. Y. Wang, M. Q. Jian, Y. Y. Zhang, R. R. Liang, H. Tian, Y. Yang and T. L. Ren, *Acs Nano*, 2018, 12, 2346-2354.
14. Y. F. Cheng, Y. A. Ma, L. Y. Li, M. Zhu, Y. Yue, W. J. Liu, L. F. Wang, S. F. Jia, C. Li, T. Y. Qi, J. B. Wang and Y. H. Gao, *Acs Nano*, 2020, 14, 2145-2155.
15. G. Ge, Y. C. Cai, Q. C. Dong, Y. Z. Zhang, J. J. Shao, W. Huang and X. C. Dong, *Nanoscale*,

2018, 10, 10033-10040.

16. Y. Yue, N. S. Liu, W. J. Liu, M. A. Li, Y. A. Ma, C. Luo, S. L. Wang, J. Y. Rao, X. K. Hu, J. Su, Z. Zhang, Q. Huang and Y. H. Gao, *Nano Energy*, 2018, 50, 79-87.
